# Supplementary material
Source: ML conference proceedings conference paper supplement (https://openaccess.thecvf.com/content/CVPR2021/html/Yan_LightTrack_Finding_Lightweight_CVPR_2021_paper.html)
Supplement: Supplementary file 1 [file Yan_LightTrack_Finding_Lightweight_CVPR_2021_supplemental.zip]

# LightTrack: Finding Lightweight Neural Networks for Object Tracking via One-Shot Architecture Search — Supplementary Material —

Bin Yan<sup>1,2,\*</sup>, Houwen Peng<sup>1,\*,†</sup>, Kan Wu<sup>1,3,\*</sup>, Dong Wang<sup>2</sup>, Jianlong Fu<sup>1</sup>, and Huchuan Lu<sup>2,4</sup>

<sup>1</sup>Microsoft Research Asia <sup>2</sup>Dalian University of Technology

<sup>3</sup>Sun Yat-sen University <sup>4</sup>Peng Cheng Laboratory

In this supplementary material, we present more technical details of the proposed method (Section 4 in the manuscript) and more implementation details and experimental comparisons (Section 5). We also provide the changing of architectures during search. The main content is summarized as follows.

- **(Section 4) LightTrack**

We elaborate the “Phase 2: Training Tracking Supernet” and “Phase 3: Searching with Evolutionary Algorithm” of the search pipeline in Appendix A and Appendix B, respectively.

- **(Section 5) Experiments**

In Appendix C, we provide the details of the search space and the supernet architecture used to search for LightTrack-LargeA and LargeB.

- **(Others) Searched Architectures**

We visualize the changes of architectures during search in the [Archs.gif](#).

## Appendix A

We present the details of tracking supernet training in Alg. 1.

---

**Algorithm 1** Training Tracking Supernet

---

**Input:** Tracking training set  $T_{trk}$  consisting of exemplar images and search images, backbone supernet  $\mathcal{N}_b$  with search space  $\mathcal{A}_b$  and pretrained weight  $W_b^p$ , head supernet  $\mathcal{N}_h$  with search space  $\mathcal{A}_h$  and weight  $W_h$ , max iteration  $I$ .

**Output:** Trained tracking supernet  $\mathcal{N}(\mathcal{A}_b, W_b^*, \mathcal{A}_h, W_h^*)$ .

- 1: Initialize the weight  $W_b$  of the backbone supernet with the pre-trained weight  $W_b^p$ .
  - 2: Initialize the head supernet with random weight  $W_h$ .
  - 3:  $i \leftarrow 0$ .
  - 4: **while** train iteration  $i \in [0, I)$  **do**
  - 5:     Randomly sample an architecture  $\alpha = \{\alpha_b, \alpha_h\}$  from the tracking supernet  $\mathcal{N} = \{\mathcal{N}_b, \mathcal{N}_h\}$ .
  - 6:     Run the subnet  $\mathcal{N}(\alpha_b, W_b; \alpha_h, W_h)$  over the current training batch, calculate the loss  $\mathcal{L}_{train}^{trk}$ .
  - 7:     Update the subnet’s weight  $\{W_b(\alpha_b), W_h(\alpha_h)\}$  using the gradients with respect to  $\mathcal{L}_{train}^{trk}$ .
  - 8:      $i \leftarrow i + 1$
  - 9: **end while**
  - 10: Output the trained tracking supernet  $\mathcal{N}$  with the optimal weight  $\{W_b^*, W_h^*\}$ .
- 

## Appendix B

Alg. 2 presents the evolutionary algorithm used in LightTrack.

## Appendix C

Tab. 1 shows the search space and the supernet architecture used to search for LightTrack-LargeA and LightTrack-LargeB. The basic building blocks are still the inverted residual block (MBConv) [4] with squeeze-excitation module [3, 2] and the depthwise separable convolution (DSConv) [1]. However, different from the settings of LightTrack-Mobile, this large

---

**Algorithm 2** Searching with Evolutionary Algorithm

---

**Input:** Trained tracking supernet  $\mathcal{N}$ , tracking training subnet  $T_{trk}^{sub}$ , tracking validation set  $V_{trk}$ , maximum population size  $|P|_{max}$ , number of dominant individuals  $K$ , mutation probability  $prob_{mut}$ , user-specified maximum Flops  $Flops_{max}$  and Params  $Params_{max}$ , number of evolution generation  $G_E$ .

**Output:** The most promising architecture  $\alpha^*$ .

```
1:  $pop_{(0)} \leftarrow \text{get-population}(|P|_{max}, Flops_{max}, Params_{max})$ ,  $\alpha^* \leftarrow \emptyset$ ,  $g \leftarrow 0$ 
2: while  $g \in [0, G_E)$  do
3:   while  $\alpha \in pop_{(g)}$  do
4:     Recalculate subnet  $\mathcal{N}(\alpha, W)$ 's BN on  $T_{trk}^{sub}$ .
5:     Compute tracking accuracy on  $V_{trk}$ .
6:   end while
7:   Get dominant individuals  $pop_{(g)}^{dom}$  by selecting top  $K$  individuals with the highest tracking accuracy.
8:   Get mutation and crossover population  $pop_{(g)}^{mut}$ ,  $pop_{(g)}^{crs}$ .
9:    $pop_{(g)}^{mut} \leftarrow \text{mutation}(pop_{(g)}^{dom}, prob_{mut}, constraints)$ ,
    $pop_{(g)}^{crs} \leftarrow \text{crossover}(pop_{(g)}^{dom}, constraints)$ ,
10:   $pop_{(g+1)} \leftarrow \{pop_{(g)}^{mut}, pop_{(g)}^{crs}\}$ .
11:   $g \leftarrow g + 1$ .
12: end while
13: Output the optimal architecture  $\alpha^*$  by choosing the subnet with the highest tracking accuracy.
```

---

supernet includes more searchable layers in backbone (21 v.s. 14 layers) and in head (16 v.s. 8 layers). Besides, there are more channels ( $\{192, 256, 320\}$  v.s.  $\{128, 192, 256\}$ ) in the head supernet.

|          | Input Shape       | Operators         | $N_{choices}$ | $Chn$ | $Rpt$ | Stride |
|----------|-------------------|-------------------|---------------|-------|-------|--------|
| Backbone | $256^2 \times 3$  | $3 \times 3$ Conv | 1             | 16    | 1     | 2      |
|          | $128^2 \times 16$ | DSConv            | 1             | 16    | 1     | 1      |
|          | $128^2 \times 16$ | MBConv / Skip     | 6             | 24    | 5     | 2      |
|          | $64^2 \times 24$  | MBConv / Skip     | 6             | 40    | 5     | 2      |
|          | $32^2 \times 40$  | MBConv / Skip     | 6             | 80    | 5     | 2      |
|          | $16^2 \times 80$  | MBConv / Skip     | 6             | 96    | 6     | 1      |
| Cls Head | $16^2 \times 128$ | DSConv            | 6             | $C_1$ | 1     | 1      |
|          | $16^2 \times C_1$ | DSConv / Skip     | 3             | $C_1$ | 15    | 1      |
|          | $16^2 \times C_1$ | 3x3 Conv          | 1             | 1     | 1     | 1      |
| Reg Head | $16^2 \times 128$ | DSConv            | 6             | $C_2$ | 1     | 1      |
|          | $16^2 \times C_2$ | DSConv / Skip     | 3             | $C_2$ | 15    | 1      |
|          | $16^2 \times C_2$ | 3x3 Conv          | 1             | 4     | 1     | 1      |

Table 1: Search space and supernet structure of LightTrack-LargeA and LightTrack-LargeB. “ $N_{choices}$ ” represents the number of choices for the current block. “ $Chn$ ” and “ $Rpt$ ” denote the number of channels per block and the maximum number of repeated blocks in a group, respectively. “Stride” indicates the convolutional stride of the first block in each repeated group. The classification and regression heads are allowed to use different numbers of channels, denoted as  $C_1, C_2 \in \{192, 256, 320\}$ . The input is a search image with size of  $256 \times 256 \times 3$ .

## References

- [1] François Chollet. Xception: Deep learning with depthwise separable convolutions. In *CVPR*, 2017. 1
- [2] Andrew Howard, Mark Sandler, Grace Chu, Liang-Chieh Chen, Bo Chen, Mingxing Tan, Weijun Wang, Yukun Zhu, Ruoming Pang, Vijay Vasudevan, et al. Searching for mobilenetv3. In *ICCV*, 2019. 1
- [3] Jie Hu, Li Shen, and Gang Sun. Squeeze-and-excitation networks. In *CVPR*, 2018. 1
- [4] Mark Sandler, Andrew Howard, Menglong Zhu, Andrey Zhmoginov, and Liang-Chieh Chen. Mobilenetv2: Inverted residuals and linear bottlenecks. In *CVPR*, 2018. 1
