# Supplementary material
Source: ML conference proceedings conference paper supplement (https://openaccess.thecvf.com/content/CVPR2021/html/Yan_LightTrack_Finding_Lightweight_CVPR_2021_paper.html)

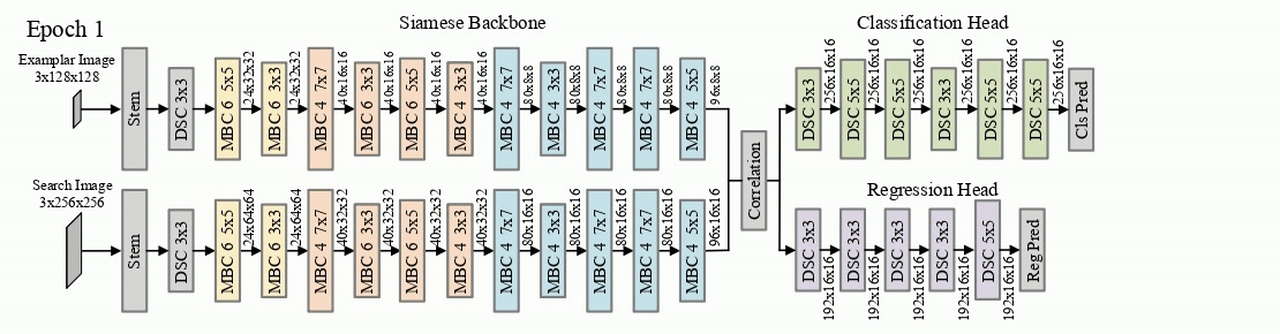

Supplement: Supplementary file 2 [file Yan_LightTrack_Finding_Lightweight_CVPR_2021_supplemental.zip › Archs.gif]
